# Supplementary material
Source: Springer Nature journal article supplement (https://www.springermedizin.de/resource/supplementary/12877_2010_779_MOESM2_ESM.pdf/9440264)

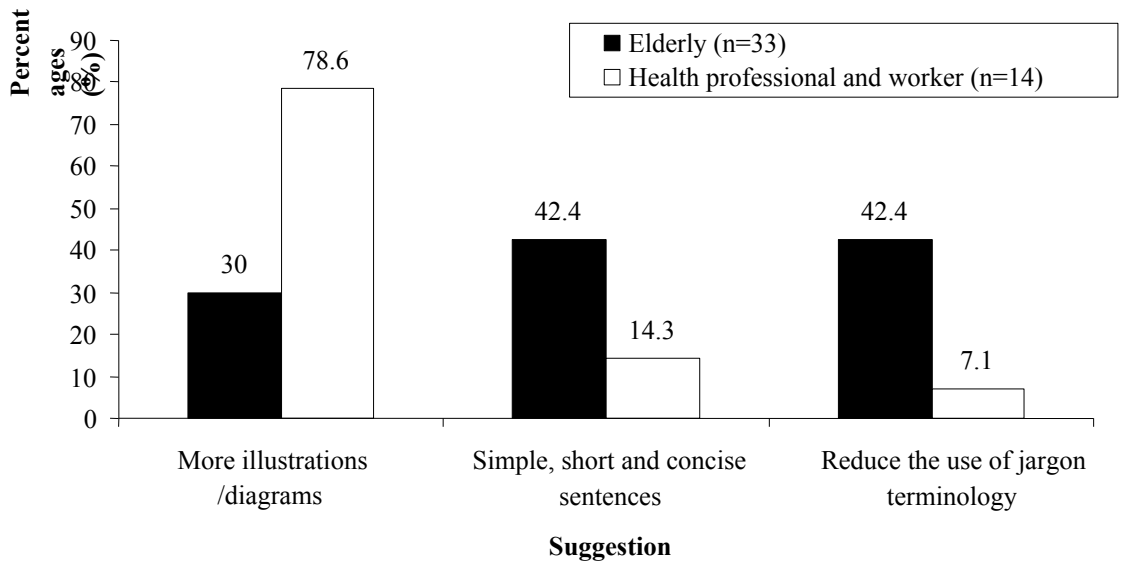

<sup>a</sup> Cumulative percentage is more than 100% as subjects may have multiple answer

Supplement: MOESM2 [file 9440264]
